# Supplementary material for: CPVT-associated calmodulin variants N53I and A102V dysregulate Ca2+ signalling via different mechanisms
Source: PubMed Central journal article supplement (PMC8917356; doi:10.1242/jcs.258796), 2022-01-18
Supplement: joces-135-258796-s1.pdf [file joces-135-258796-s1.pdf]

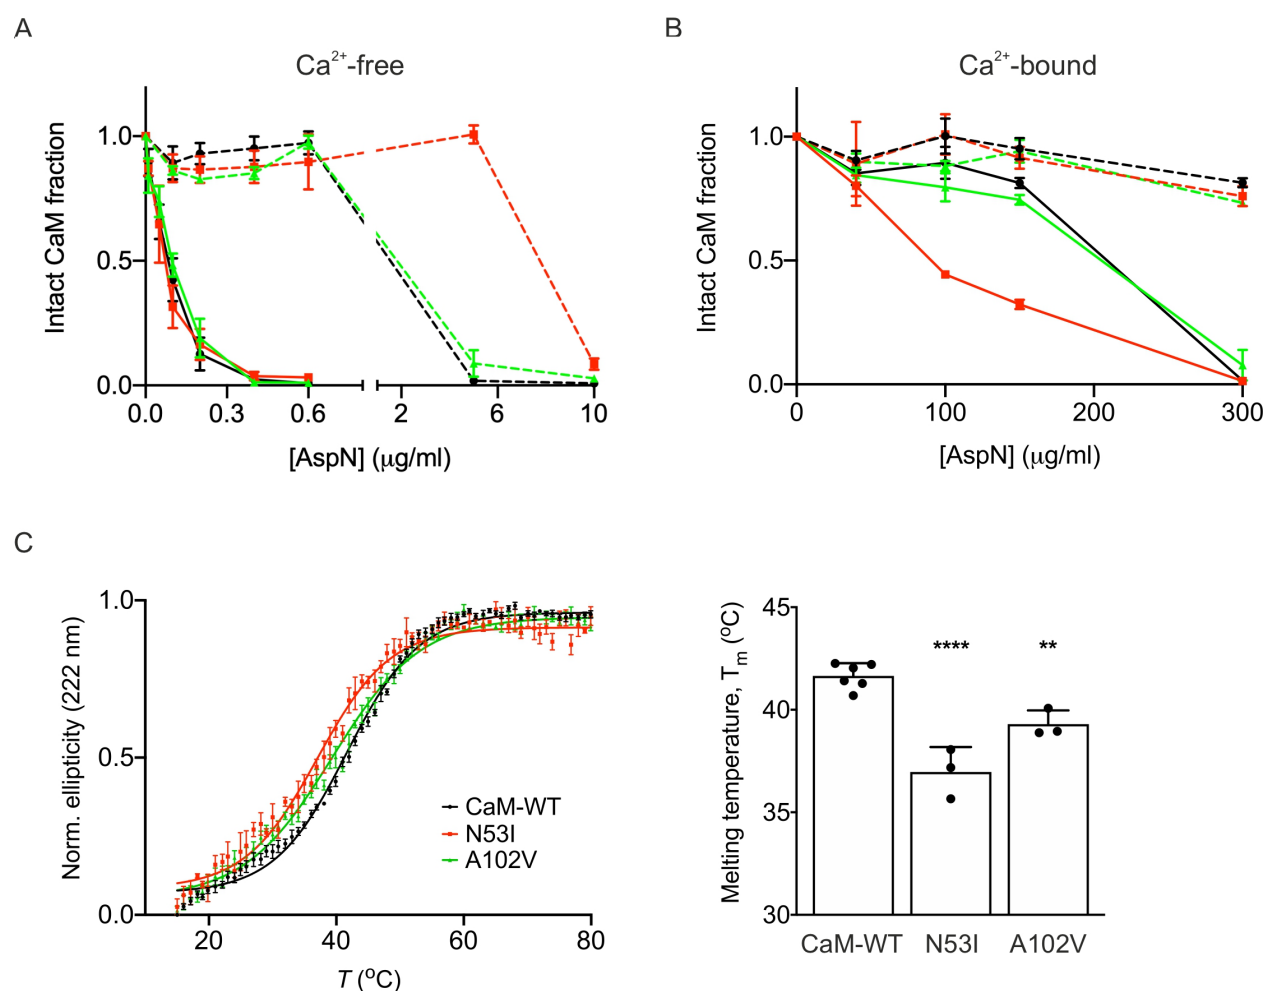

**Fig. S1. Arrhythmogenic mutations N53I and A102V affect protease and thermal stability of CaM.** (A-B) AspN limited proteolysis of CaM-WT and mutants in (A) absence and (B) presence of Ca<sup>2+</sup>. Purified CaM proteins (CaM-WT, black; CaM-N53I, red; CaM-A102V, green) were mixed with increasing [AspN] for 30 minutes at 37 °C, with (dotted line) or without (plain lines) pre-incubation with RyR2<sub>3583-3603</sub> peptide. The fraction of intact CaM was determined by SDS-PAGE and Coomassie staining. Bands were quantified by densitometry analysis (Fiji). Data were normalised and expressed as mean ± SEM. Experiments were performed in 3-5 independent replicates.

Number of experimental replicates for apo-conditions was: n=4 for CaM-WT, n=4 for CaM-N53I, n=5 for CaM-A102V, n=4 for CaM-WT:RyR2, n=4 for CaM-N53I:RyR2 and n=4 for CaM-A102V:RyR2. Number of experimental replicates for Ca<sup>2+</sup>-saturating conditions was: n=3 for CaM-WT, n=3 for CaM-N53I, n=3 for CaM-A102V, n=3 for CaM-WT:RyR2, n=3 for CaM-N53I:RyR2 and n=3 for CaM-A102V:RyR2.

(C) Thermal unfolding of CaM proteins (10 μM) monitored by circular dichroism recorded at 222 nm from 15 to 80 °C, in the presence of 1 mM EGTA. Data were normalised and expressed as mean ± SEM. Melting temperature (T<sub>m</sub>) was obtained by fitting the traces to the Boltzmann equation. Number of experimental replicates was: n=6 for CaM-WT, n=3 for CaM-N53I and n=3 for CaM-A102V. Differences between three groups were determined using one-way ANOVA with the Dunnett's post-hoc test. \*\*P < 0.01, \*\*\*\*P < 0.0001, vs. CaM-WT.

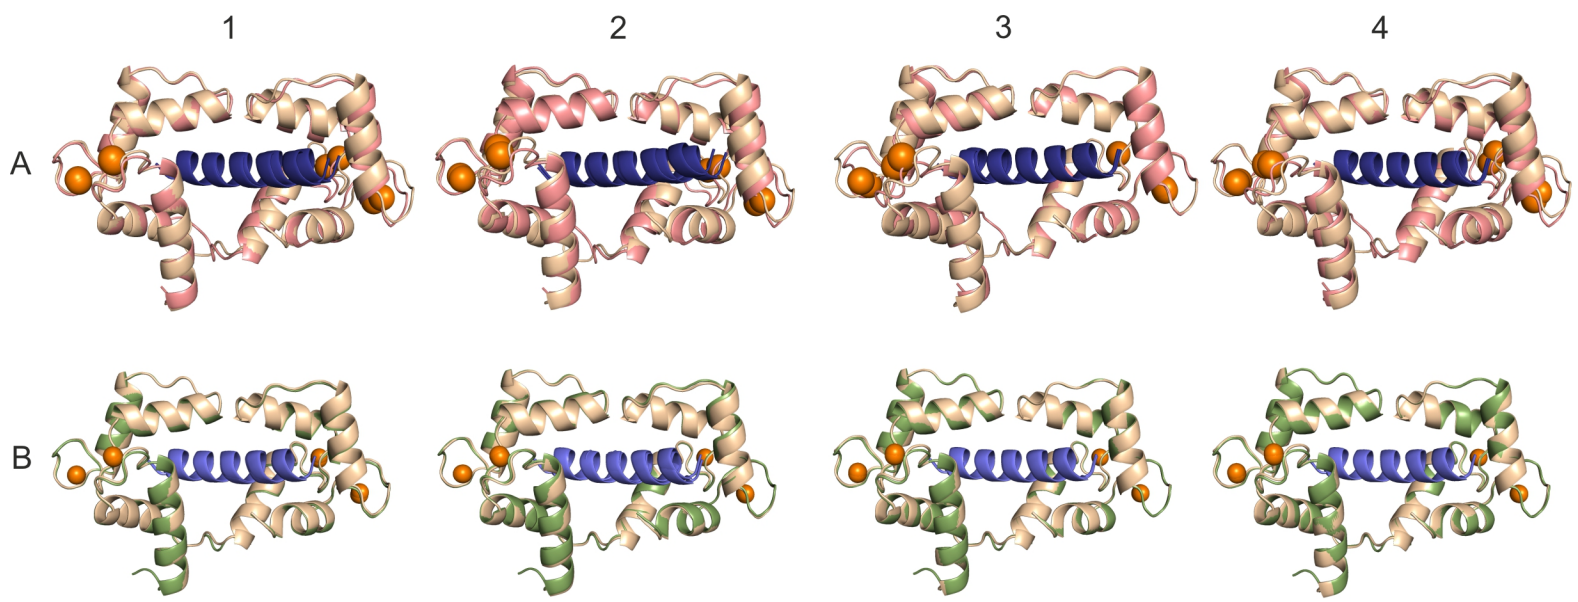

**Fig. S2. Structural superposition of Ca atoms of Ca<sup>2+</sup>/CaM-RyR peptide complexes.** Superimposition of the crystal structure of Ca<sup>2+</sup>/CaM-WT:RyR<sub>23583-3603</sub> and (A) Ca<sup>2+</sup>/CaM-N53I:RyR<sub>23583-3603</sub> or (B) Ca<sup>2+</sup>/CaM-A102V:RyR<sub>23583-3603</sub>. Superimposition was based on (1) N-terminal region (residues 5-64), (2) flexible helix region (residues 65-92), (3) C-terminal region (residues 93-148) or (4) RyR2 peptide.

CaM-WT is displayed in beige (CaM-WT from PDB 2BCX is displayed in yellow), CaM-N53I in salmon and CaM-A102V in green. RyR<sub>23583-3603</sub> (KKAVWHKLLSKQRKRAVVACF) is shown in blue. Ca<sup>2+</sup> ions are represented as orange spheres. Images were generated using PyMOL software.

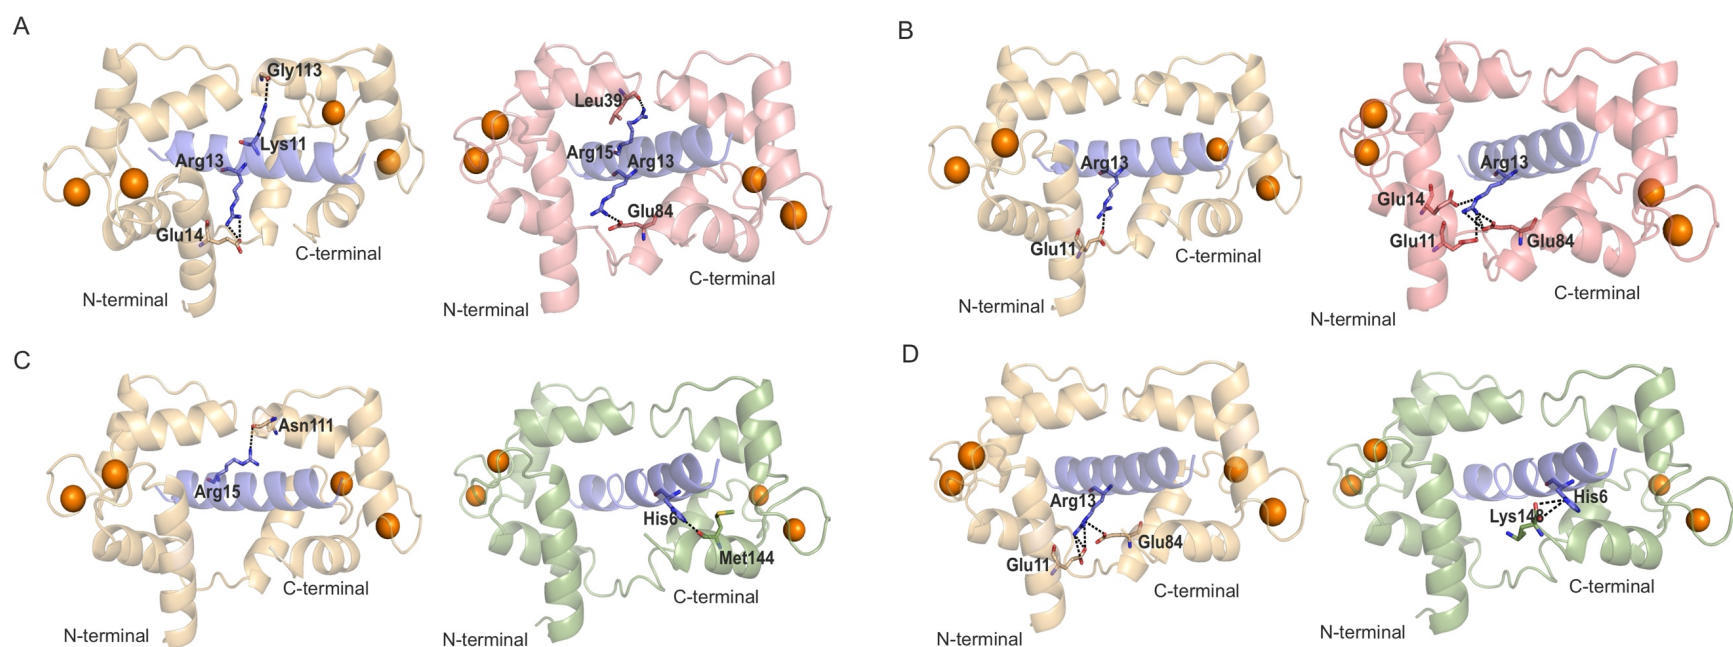

**Fig. S3. Comparison of the crystal structures of  $\text{Ca}^{2+}/\text{CaM-WT}:\text{RyR2}_{3583-3603}$  (PDB 6XXF),  $\text{Ca}^{2+}/\text{CaM-N53I}:\text{RyR2}$  (PDB 6XY3) and  $\text{Ca}^{2+}/\text{CaM-A102V}:\text{RyR2}_{3583-3603}$  (PDB 6XXX).** Cartoon representation of (A-B)  $\text{Ca}^{2+}/\text{CaM-WT}:\text{RyR2}_{3583-3603}$  (left; CaM in beige and RyR2<sub>3583-3603</sub> peptide in blue colour) and  $\text{Ca}^{2+}/\text{CaM-N53I}:\text{RyR2}_{3583-3603}$  peptide complex (right; CaM-N53I in salmon and RyR2 peptide in blue colour). (C-D)  $\text{Ca}^{2+}/\text{CaM-WT}:\text{RyR2}_{3583-3603}$  (left; CaM in beige and RyR2<sub>3583-3603</sub> peptide in blue colour) and  $\text{Ca}^{2+}/\text{CaM-A102V}:\text{RyR2}_{3583-3603}$  peptide complex (right; CaM-A102V in green and RyR2 peptide in blue colour).

Residues from  $\text{Ca}^{2+}/\text{CaM}$  and corresponding peptides involved in (A, C) H-bonds and (B, D) salt bridges unique to each are represented in sticks with interactions marked in black dashed lines.  $\text{Ca}^{2+}$  ions are represented as orange spheres.

Peptide residues are numbered based on the SI index in Table S4.

RyR2<sub>3583-3603</sub> (KKAVWHKLLSKQRKRAVVACF) is numbered 1-21. Images were generated using PyMOL software.

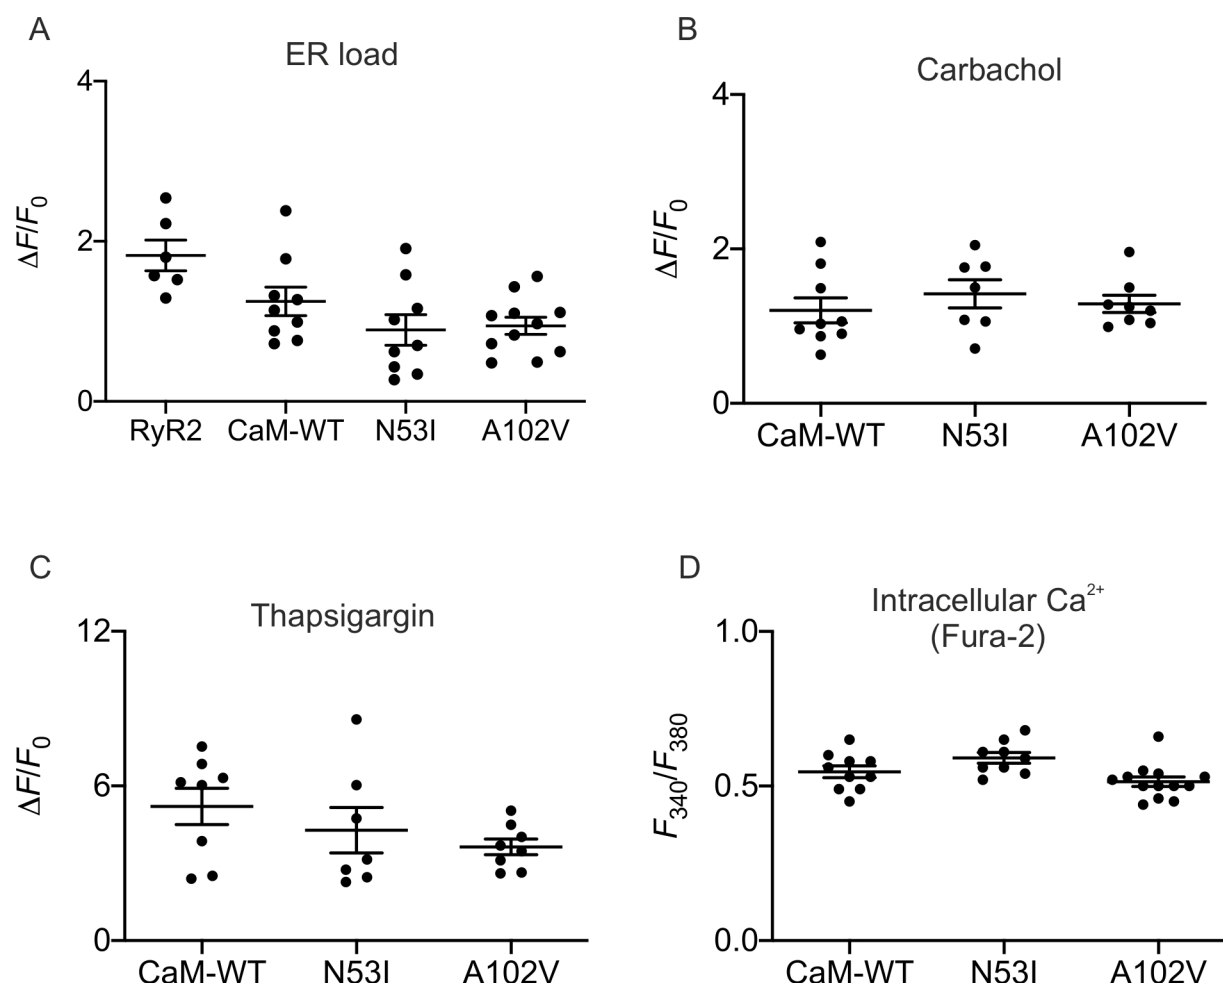

**Fig. S4. Over-expression of CaM-WT and CPVT-associated CaM variants did not affect ER-load (caffeine), non-RyR Ca<sup>2+</sup> response (carbachol, thapsigargin) and intracellular Ca<sup>2+</sup> concentrations.**

(A-C) HEK293T cells transfected with CaM variants ± RyR2 were loaded with Calbryte 520 to monitor intracellular Ca<sup>2+</sup> concentration changes. Live cells were imaged on a 3i spinning-disk confocal microscope after stimulation with (A) caffeine, (B) carbachol or (C) thapsigargin. (D) HEK293T cells transfected with CaM variants were loaded with Fura-2 to monitor intracellular Ca<sup>2+</sup> concentration. Live cells were analysed using a Nikon Eclipse epifluorescence microscope and ratiometric imaging.

Data were processed using Fiji and expressed as mean ± SEM. Number of experimental replicates for the ER load experiments (N=dishes) was: N=6 for RyR2, N=9 for RyR2 + CaM-WT, N=9 for RyR2 + CaM-N53I and N=11 for RyR2 + CaM-A102V. Number of experimental replicates for the carbachol experiments (N=dishes) was: N=9 for CaM-WT, N=7 for CaM-N53I and N=8 for CaM-A102V. Number of experimental replicates for the thapsigargin experiments (N=dishes) was: N=8 for CaM-WT, N=7 for CaM-N53I and N=8 for CaM-A102V. Number of experimental replicates for the intracellular Ca<sup>2+</sup> experiments (N=dishes, n = fields of view) was: N=4, n=10 for CaM-WT; N=3, n=9 for CaM-N53I and N=6, n=13 for CaM-A102V. Differences between groups were determined using one-way ANOVA vs. CaM-WT.

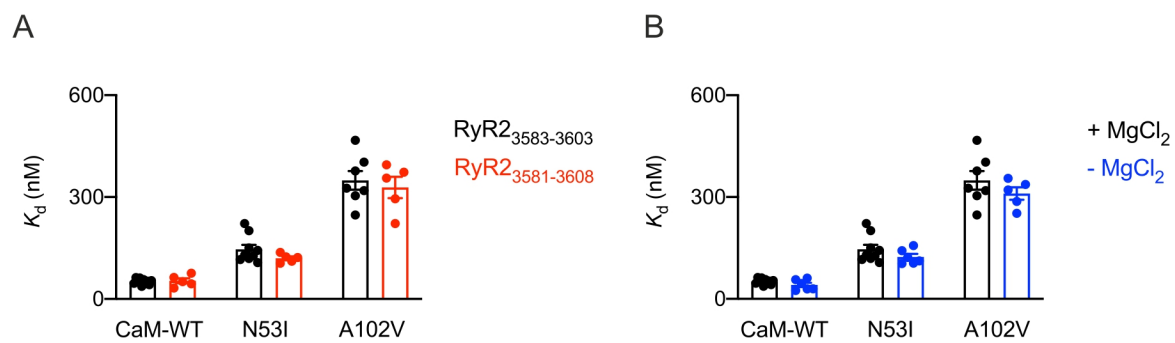

**Fig. S5. Effect of peptide length and magnesium concentration on Ca<sup>2+</sup>/CaM binding to RyR2 using ITC.** (A) Affinity of the binding of Ca<sup>2+</sup>/CaM variants to RyR2<sub>3583-3603</sub> (short) and RyR2<sub>3581-3608</sub> (long) obtained by fitting to one-site binding model. (B) Affinity of the binding of Ca<sup>2+</sup>/CaM variants to RyR2<sub>3583-3603</sub> in the presence or absence of 2 mM MgCl<sub>2</sub> obtained by fitting to one-site binding model. Data were processed using the MicroCal PEAQ-ITC software and expressed as mean  $\pm$  SEM. Experiments were performed at least in 5 replicates, in the presence of 5 mM CaCl<sub>2</sub> at 25 °C.

**Table S1. The C-lobe of Ca<sup>2+</sup>/CaM binds first to RyR2.** Percentage of residue resonances assigned in the N and C lobes of various <sup>15</sup>N-labelled CaM variants from HQSC spectra analysis. Using 0.3 ppm as a threshold, the percentage of assigned resonances which have not significantly shifted in the presence of one molar equivalent RyR2<sub>3583-3603</sub> peptide are displayed for each CaM lobe (left-hand side). Percentage of assigned resonances which have not significantly shifted upon the addition of RyR2<sub>3583-3603</sub> peptide from one to two molar equivalents (right-hand side).

| CaM-WT | Unbound – 1.RyR2 |              | 1.RyR2 – 2.RyR2 |              |
|--------|------------------|--------------|-----------------|--------------|
|        | % peak assigned  | % non-movers | % peak assigned | % non-movers |
| N-lobe | 59.2             | 57.1         | 50.7            | 58.3         |
| C-lobe | 36.4             | 29.2         | 36.4            | 91.7         |

  

| N53I   | Unbound – 1.RyR2 |              | 1.RyR2 – 2.RyR2 |              |
|--------|------------------|--------------|-----------------|--------------|
|        | % peak assigned  | % non-movers | % peak assigned | % non-movers |
| N-lobe | 45.1             | 43.8         | 42.3            | 56.7         |
| C-lobe | 34.9             | 26.1         | 33.3            | 81.8         |

  

| A102V  | Unbound – 1.RyR2 |              | 1.RyR2 – 2.RyR2 |              |
|--------|------------------|--------------|-----------------|--------------|
|        | % peak assigned  | % non-movers | % peak assigned | % non-movers |
| N-lobe | 60.6             | 46.5         | 49.3            | 54.3         |
| C-lobe | 33.3             | 18.2         | 31.8            | 76.2         |

**Table S2. Data collection and refinement statistics.**

Values in brackets are for the last resolution shell.

|                                              | Ca <sup>2+</sup> /CaM-<br>WT:RyR2 <sub>3583-3603</sub> | Ca <sup>2+</sup> /CaM-<br>N53I:RyR2 <sub>3583-3603</sub> | Ca <sup>2+</sup> /CaM-<br>A102V:RyR2 <sub>3583-3603</sub> |
|----------------------------------------------|--------------------------------------------------------|----------------------------------------------------------|-----------------------------------------------------------|
| <b>Data collection Wavelength (Å)</b>        | 0.97857                                                | 0.97624                                                  | 0.97624                                                   |
| <b>Beamline</b>                              | Proxima 1                                              | I03                                                      | I03                                                       |
| <b>Detector</b>                              | Pilatus                                                | Pilatus                                                  | Pilatus                                                   |
| <b>Space group</b>                           | P2 <sub>1</sub> 2 <sub>1</sub> 2 <sub>1</sub>          | P2 <sub>1</sub> 2 <sub>1</sub> 2 <sub>1</sub>            | P2 <sub>1</sub> 2 <sub>1</sub> 2 <sub>1</sub>             |
| <b>Unit-cell dimensions (a,b,c) (Å)</b>      | 39.92, 41.71, 85.99                                    | 39.01, 42.70, 89.36                                      | 39.97, 41.67, 85.75                                       |
| <b>Resolution (Å)</b>                        | 37.56-1.70 (1.70-1.73)                                 | 44.72-2.00 (2.00-2.05)                                   | 27.34 - 1.23 (1.25 - 1.23)                                |
| <b>Rmerge %</b>                              | 9.2 (57.2)                                             | 10.0 (36.8)                                              | 3.8 (81.6)                                                |
| <b>I/σ (last shell)</b>                      | 12.5 (6.2)                                             | 8.9 (3.8)                                                | 18.45 (1.15)                                              |
| <b>Completeness (%)</b>                      | 100.0 (98.7)                                           | 100.0 (100.0)                                            | 98.48 (84.19)                                             |
| <b>Redundancy</b>                            | 5.9 (5.7)                                              | 5.3 (5.4)                                                | 5.66 (2.65)                                               |
| <b>Half-set correlation CC<sub>1/2</sub></b> | 0.991 (0.870)                                          | 0.994 (0.908)                                            | 5.66 (2.65)                                               |
| <b>No. of reflections</b>                    | 16416                                                  | 10591                                                    | 41749                                                     |
| <b>R<sub>work</sub>/R<sub>free</sub></b>     | 18.0/20.5                                              | 20.8/25.9                                                | 13.7/19.1                                                 |
| <b>No. of atoms</b>                          |                                                        |                                                          |                                                           |
| Protein                                      | 1312                                                   | 1295                                                     | 1386                                                      |
| Ca ions                                      | 4                                                      | 4                                                        | 4                                                         |
| Water                                        | 140                                                    | 50                                                       | 219                                                       |
| <b>B factor (Å<sup>2</sup>)</b>              |                                                        |                                                          |                                                           |
| Protein                                      | 22.63                                                  | 35.81                                                    | 24.42                                                     |
| Ca ions                                      | 15.87                                                  | 29.55                                                    | 19.16                                                     |
| Waters                                       | 28.21                                                  | 32.97                                                    | 22.45                                                     |
| <b>R.M.S deviations</b>                      |                                                        |                                                          |                                                           |
| Bond length (Å)                              | 0.013                                                  | 0.008                                                    | 0.017                                                     |
| Bond angles (°)                              | 1.805                                                  | 1.457                                                    | 2.106                                                     |
| <b>PDB code</b>                              | <b>6XXF</b>                                            | <b>6XY3</b>                                              | <b>6XXX</b>                                               |

**Table S3. Structural RMSD between various regions of the Ca<sup>2+</sup>/CaM-WT:RyR2<sub>3583-3603</sub> peptide complex and the Ca<sup>2+</sup>/CaM-N53I:RyR2<sub>3583-3603</sub>, Ca<sup>2+</sup>/CaM-A102V:RyR2<sub>3583-3603</sub> peptide complex crystal structures.**

RMSD values were obtained using PyMOL “super” command.

| Ca <sup>2+</sup> /CaM-WT:RyR2 <sub>3583-3603</sub> | Ca <sup>2+</sup> /CaM-N53I:RyR2 <sub>3583-3603</sub> RMSD (Å) | Ca <sup>2+</sup> /CaM-A102V:RyR2 <sub>3583-3603</sub> RMSD (Å) |
|----------------------------------------------------|---------------------------------------------------------------|----------------------------------------------------------------|
| Full complex                                       | 1.31                                                          | 0.63                                                           |
| N-terminal region (residue 6 - 65)                 | 0.90                                                          | 0.72                                                           |
| Flexible helix (residue 66 - 93)                   | 1.43                                                          | 0.77                                                           |
| C-terminal region (residue 94 - 149)               | 0.77                                                          | 0.52                                                           |
| RyR2 <sub>3583-3603</sub> peptide                  | 1.13                                                          | 0.21                                                           |



**Table S4. Residues involved in H-bond and salt bridge interactions between RyR2<sub>3583-3603</sub> peptide and Ca<sup>2+</sup>/CaM-WT, Ca<sup>2+</sup>/CaM-N53I and Ca<sup>2+</sup>/CaM-A102V.** Data were obtained using PDBePISA server.

| Sl. | RyR2 <sub>3583-3603</sub> | H-bond interactions       |                            |                             | Salt bridge interactions |                            |                             |
|-----|---------------------------|---------------------------|----------------------------|-----------------------------|--------------------------|----------------------------|-----------------------------|
|     |                           | Ca <sup>2+</sup> /CaM-WT  | Ca <sup>2+</sup> /CaM-N53I | Ca <sup>2+</sup> /CaM-A102V | Ca <sup>2+</sup> /CaM-WT | Ca <sup>2+</sup> /CaM-N53I | Ca <sup>2+</sup> /CaM-A102V |
| 1   | Lys3583                   | Glu123; Glu127            | Glu127 <sup>1</sup>        | Glu123; Glu127              | Glu123; Glu127           | Glu127 <sup>1</sup>        | Glu123; Glu127              |
| 2   | Lys3584                   | Glu127                    | Glu127                     | Glu127                      | -                        | -                          | -                           |
| 3   | Ala3585                   | -                         | -                          | -                           | -                        | -                          | -                           |
| 4   | Val3586                   | -                         | -                          | -                           | -                        | -                          | -                           |
| 5   | Trp3587                   | Met124                    | Met124                     | Met124                      | -                        | -                          | -                           |
| 6   | His3588                   | -                         | -                          | Met144                      | -                        | -                          | Lys148                      |
| 7   | Lys3589                   | Glu114                    | Glu114                     | Glu114                      | Glu114                   | Glu114                     | Glu114                      |
| 8   | Leu3590                   | -                         | -                          | -                           | -                        | -                          | -                           |
| 9   | Leu3591                   | -                         | -                          | -                           | -                        | -                          | -                           |
| 10  | Ser3592                   | -                         | -                          | -                           | -                        | -                          | -                           |
| 11  | Lys3593                   | Leu112;<br>Gly113; Glu114 | Leu112; Glu114             | Leu112; Gly113;<br>Glu114   | Glu114                   | Glu114                     | Glu114                      |
| 12  | Gln3594                   | -                         | -                          | -                           | -                        | -                          | -                           |
| 13  | Arg3595                   | Glu11; Glu14              | Glu11; Glu84               | Glu11; Glu14                | Glu11; Glu14; Glu84      | Glu11; Glu14; Glu84        | Glu14; Glu84                |
| 14  | Lys3596                   | -                         | -                          | -                           | -                        | -                          | -                           |
| 15  | Arg3597                   | Asn111                    | Leu39; Asn111              | -                           | -                        | -                          | -                           |
| 16  | Ala3598                   | -                         | -                          | -                           | -                        | -                          | -                           |
| 17  | Val3699                   | -                         | -                          | -                           | -                        | -                          | -                           |
| 18  | Val3600                   | -                         | -                          | -                           | -                        | -                          | -                           |
| 19  | Ala3601                   | -                         | -                          | -                           | -                        | -                          | -                           |
| 20  | Cys3602                   | Lys75                     | - <sup>2</sup>             | Lys75                       | -                        | -                          | -                           |
| 21  | Phe3603                   | -                         | -                          | -                           | -                        | -                          | -                           |

<sup>1</sup> Glu123 side-chain atoms are not resolved in the structure

<sup>2</sup> Lys75 side-chain atoms are not resolved in the structure
